# Supplementary material for: Cross-cultural adaptation and psychometric validation of the Chinese quality-of-life questionnaire for patients with systemic sclerosis
Source: PeerJ. 2025 Nov 19;13:e20331. doi: 10.7717/peerj.20331 (PMC12640127; doi:10.7717/peerj.20331)
Supplement: Supplemental Information 1 [file peerj-13-20331-s001.xlsx]

## Sheet: Sheet1
subject	item 1	item2	item3	item4	item5	item6	item7	item8	item9	item10	item11	item12	item13	item14	item15	item16	item17	item18	item19	item20	item1	item22	item23	item24	item25	item26	item27	item28	item29	gender	age	Marital status:	Occupation:	.religion:	degree of education:	Medical insurance	income	Residence	living pattem:	Systemic sclerosis types::	(The course of systemic sclerosis:___	. Polyarteritis with lung involvement
1	3	2	3	3	3	2	0	2	3	3	3	0	3	0	0	3	3	3	0	3	2	0	3	2	0	3	2	3	2	2	44	2	5	4	1	6	2	1	4	2	2	1
2	0	0	0	0	0	0	0	0	0	1	1	0	1	1	1	2	0	0	1	0	1	0	2	0	0	0	0	0	0	2	50	2	5	5	1	4	1	1	5	2	2	1
3	3	2	3	3	3	3	3	3	3	0	0	3	0	3	3	1	3	3	3	3	0	3	1	2	3	0	3	0	2	2	39	2	5	5	2	3	2	2	4	1	2	1
4	3	3	3	3	3	3	3	3	0	0	0	2	0	3	3	0	3	3	3	0	0	2	0	3	1	0	3	0	3	2	58	2	5	5	3	3	1	2	4	2	22	1
5	3	3	3	3	3	3	3	3	3	1	2	0	2	0	0	3	3	3	0	3	3	0	3	3	0	0	3	0	3	2	65	2	4	5	5	4	1	1	4	2	8	1
6	2	2	3	2	3	2	2	2	2	0	0	3	0	3	0	0	3	3	3	2	0	0	0	2	3	2	2	1	1	2	56	2	5	5	1	4	1	2	5	2	2	1
7	0	0	0	0	0	0	0	0	3	0	0	3	0	3	3	1	0	0	3	3	0	3	0	0	2	0	0	0	0	2	27	2	3	5	1	3	3	1	5	1	10	0
8	3	3	3	3	3	3	2	3	3	0	2	0	2	0	0	3	3	0	0	3	1	0	3	3	0	0	0	0	3	2	59	2	3	5	2	4	3	2	5	1	3	1
9	3	2	3	3	3	3	3	3	3	0	0	3	0	3	3	0	3	3	3	3	0	3	0	2	2	3	3	3	2	1	42	2	2	5	4	3	1	2	3	1	4	0
10	3	3	3	3	3	3	3	3	3	3	3	3	3	3	3	3	3	3	3	3	3	3	3	3	2	3	3	3	2	2	33	1	2	5	4	3	2	2	6	2	8	1
11	0	0	0	0	0	0	0	0	3	0	0	0	0	1	1	0	0	0	1	2	0	0	0	0	0	0	0	1	0	1	59	2	3	5	1	3	2	2	4	1	2	1
	3	3	3	3	3	3	3	3	1	0	0	0	0	1	1	2	3	2	1	0	0	0	1	3	0	3	2	3	3	2	67	2	5	5	5	3	2	1	4	1	2	1
	3	3	3	3	3	3	3	3	3	3	3	1	3	1	1	3	3	3	2	3	3	1	3	3	1	0	3	0	3	1	57	2	3	5	4	3	2	2	4	1	3	0
	0	0	1	0	0	0	0	0	0	0	0	3	0	3	0	0	3	3	3	0	0	3	0	0	3	0	3	0	0	2	57	2	5	5	2	2	2	2	4	1	2	1
	3	3	3	3	3	3	3	3	0	2	2	3	2	3	3	3	3	3	3	0	2	3	2	3	3	0	3	0	3	1	63	2	3	5	1	3	2	2	4	1	2	0
	3	3	3	3	3	0	0	0	3	1	2	0	2	0	0	3	3	3	0	3	3	0	3	3	0	3	0	3	3	1	59	2	3	5	1	3	2	2	4	1	3	1
	0	0	0	0	0	0	0	0	0	0	0	0	0	0	0	1	0	0	1	0	0	0	0	0	0	3	0	3	0	2	60	1	2	5	4	3	2	2	2	2	7	1
	3	3	3	3	3	3	3	3	3	3	3	3	3	3	3	3	3	3	3	3	3	3	3	3	3	3	3	3	3	1	59	2	3	5	4	3	3	2	5	2	5	1
	3	3	3	3	3	3	3	3	0	3	3	3	3	3	3	3	3	3	3	0	3	3	3	3	3	0	3	0	3	2	42	2	5	5	1	3	3	2	4	1	2	0
	0	0	0	0	0	0	0	0	3	0	0	3	0	3	3	0	0	0	3	3	0	3	0	0	3	0	0	1	0	2	33	1	2	5	4	3	2	2	2	2	8	1
	2	2	3	3	3	3	3	3	3	0	3	3	0	3	3	0	3	3	3	2	0	3	0	2	3	3	3	3	1	2	59	2	5	5	1	4	2	1	4	2	7	1
	0	0	0	0	0	0	0	0	1	2	2	3	2	3	0	2	0	0	3	0	2	3	2	0	3	1	0	1	0	1	67	2	3	5	1	3	2	2	3	1	4	1
	0	0	0	0	0	0	0	0	2	3	3	3	3	3	3	3	0	3	3	2	3	3	3	0	3	0	0	0	0	2	57	2	5	5	1	3	3	2	4	1	2	0
	1	1	2	1	1	0	3	2	3	0	0	0	0	0	0	0	2	0	0	3	2	0	0	1	0	0	2	0	0	2	59	1	2	5	4	3	2	2	2	2	8	1
	0	0	0	0	0	0	0	0	2	0	0	3	0	3	0	0	3	3	3	2	0	3	0	0	3	3	3	3	0	2	42	1	2	5	4	3	2	2	2	2	8	1
	0	0	0	0	0	0	0	0	3	0	0	1	0	2	2	0	0	0	2	3	0	1	0	0	1	0	0	1	0	1	33	2	5	5	4	3	2	2	5	1	5	0
	1	1	1	1	1	1	1	1	0	0	1	0	2	0	0	3	1	0	0	0	1	0	2	0	0	0	1	0	0	2	59	2	5	5	1	3	3	2	4	1	2	1
	1	1	2	1	2	1	1	1	3	0	0	3	0	3	3	1	2	2	3	2	0	3	0	1	3	0	1	0	1	2	67	2	5	5	1	4	1	1	4	1	1	0
	0	0	0	0	0	0	0	0	3	2	1	3	2	3	3	3	0	0	3	2	2	3	2	0	3	2	0	2	0	2	63	2	5	5	2	4	1	1	3	1	25	1
	2	2	3	3	3	3	3	3	0	0	0	3	0	3	0	1	3	3	3	0	0	1	0	2	3	3	3	3	1	2	59	2	5	5	2	4	1	1	4	1	4	1
	0	0	0	0	0	0	0	0	0	0	0	2	0	3	3	0	0	0	3	0	0	2	0	0	1	0	0	0	0	2	60	2	4	5	1	4	1	2	5	2	23	0
	3	3	3	3	3	3	3	3	3	3	3	0	3	0	0	3	3	3	0	3	3	0	3	3	0	3	3	3	3	2	59	2	3	5	2	3	2	2	3	1	30	0
	3	3	3	3	3	3	0	0	3	3	1	0	0	0	0	0	3	0	0	3	3	0	0	3	0	2	0	2	3	2	42	2	5	4	1	6	2	1	4	2	2	1
	0	0	0	0	0	0	0	0	3	0	2	0	2	0	0	3	0	0	0	3	1	0	2	0	0	3	0	3	0	2	33	2	5	5	1	4	1	1	5	2	2	1
	1	1	2	1	2	1	1	1	1	0	0	0	0	0	0	1	2	2	0	1	0	0	0	1	0	3	1	3	1	2	59	2	5	5	2	3	2	2	4	1	2	1
	3	3	3	3	3	3	3	3	3	0	2	3	0	3	3	0	3	3	3	3	0	3	0	3	3	0	3	0	3	2	67	2	5	5	3	3	1	2	4	2	22	1
	3	3	3	3	3	3	2	3	0	0	0	0	0	0	0	0	3	3	0	0	0	0	0	3	0	2	3	2	2	2	39	2	4	5	5	4	1	1	4	2	8	1
	3	3	3	3	3	3	3	3	3	0	2	3	0	3	1	0	3	3	3	3	0	3	0	2	3	3	3	3	2	2	58	2	5	5	1	4	1	2	5	2	2	1
	0	0	0	0	0	0	0	1	0	3	0	0	0	0	0	0	0	0	0	0	3	0	0	0	0	0	1	0	0	2	65	2	3	5	1	3	3	1	5	1	10	0
	2	2	3	3	3	3	3	3	3	3	2	3	3	3	0	3	3	3	3	2	3	1	3	2	3	0	3	0	1	2	56	2	3	5	2	4	3	2	5	1	3	1
	1	1	2	1	1	1	1	1	0	0	0	2	0	3	3	1	2	1	3	3	0	2	0	1	1	0	1	1	0	2	27	2	2	5	4	3	1	2	3	1	4	0
	3	2	3	3	3	3	3	3	3	3	0	0	3	0	0	3	3	3	0	3	3	0	3	2	0	3	3	3	2	1	59	1	2	5	4	3	2	2	6	2	8	1
	3	3	3	3	3	3	3	3	0	0	0	3	0	3	2	1	3	3	3	3	0	0	0	3	3	3	3	3	3	2	42	2	3	5	1	3	2	2	4	1	2	1
	0	0	0	0	0	0	0	0	1	3	3	3	3	3	3	3	0	3	3	0	3	3	3	0	2	0	0	0	0	1	33	2	5	5	5	3	2	1	4	1	2	1
	0	0	0	0	0	0	0	0	0	0	0	0	0	0	0	2	0	0	0	0	0	0	1	0	0	0	0	0	0	2	59	2	3	5	4	3	2	2	4	1	3	0
	3	3	3	3	3	3	3	3	1	3	3	3	3	3	3	3	3	3	3	0	3	3	3	3	3	3	3	3	3	1	67	2	5	5	2	2	2	2	4	1	2	1
	0	0	0	0	0	0	0	0	0	2	2	3	2	3	0	3	0	3	3	0	2	3	3	0	3	3	3	3	0	2	57	2	3	5	1	3	2	2	4	1	2	0
	3	3	3	3	3	3	3	3	3	0	0	0	0	1	1	1	3	3	1	3	0	0	0	3	0	0	3	0	3	1	57	2	3	5	1	3	2	2	4	1	3	1
	3	3	3	3	3	3	3	3	3	1	1	3	1	3	3	2	3	3	3	2	1	3	2	3	2	1	3	1	3	1	63	1	2	5	4	3	2	2	2	2	7	1
	0	0	0	0	0	1	1	0	0	3	0	0	0	0	0	0	0	0	0	0	3	3	0	0	0	0	0	0	0	2	59	2	3	5	4	3	3	2	5	2	5	1
	3	3	3	3	3	3	3	3	0	0	1	0	2	0	0	2	3	3	0	0	0	0	2	3	0	0	3	0	3	1	60	2	5	5	1	3	3	2	4	1	2	0
	0	0	0	0	0	0	3	3	0	0	0	0	0	0	0	0	0	0	0	1	3	0	0	0	0	0	3	0	0	2	59	1	2	5	4	3	2	2	2	2	8	1
	3	3	3	3	3	3	2	3	0	3	0	0	0	0	0	0	3	3	0	0	0	0	0	3	0	3	3	3	2	2	42	2	5	5	1	4	2	1	4	2	7	1
	0	0	0	0	0	0	0	0	3	3	3	1	3	1	1	3	0	0	2	3	3	1	3	0	1	1	0	1	0	2	33	2	3	5	1	3	2	2	3	1	4	1
	2	2	3	2	3	2	2	2	0	3	3	2	3	3	3	3	3	3	3	0	3	2	3	2	1	3	2	3	1	1	59	2	5	5	1	3	3	2	4	1	2	0
	3	3	3	3	3	3	3	3	3	2	3	0	3	0	0	3	3	3	0	3	3	3	3	3	0	3	3	3	3	2	67	1	2	5	4	3	2	2	2	2	8	1
	1	1	2	1	1	1	1	1	0	0	0	0	0	0	0	0	2	1	1	0	0	0	0	1	0	2	1	1	0	2	57	1	2	5	4	3	2	2	2	2	8	1
	2	1	2	2	2	2	2	2	2	0	0	0	1	0	0	2	2	2	0	2	0	0	1	1	0	0	2	0	1	2	59	2	5	5	4	3	2	2	5	1	5	0
	3	3	3	3	3	3	3	3	0	3	0	3	3	3	2	3	3	3	3	3	3	3	3	3	3	0	3	0	2	1	42	2	5	5	1	3	3	2	4	1	2	1
	2	2	2	2	2	2	2	2	2	0	0	3	0	3	3	0	2	2	3	2	0	3	0	1	2	0	2	0	1	2	33	2	5	5	1	4	1	1	4	1	1	0
	0	0	0	0	0	0	1	2	3	3	0	0	0	0	0	1	0	0	0	3	0	0	0	0	0	0	0	0	0	2	59	2	5	5	2	4	1	1	3	1	19	1
	0	0	0	0	0	0	0	0	3	1	1	2	1	3	3	2	0	2	3	3	1	2	2	0	1	0	0	0	0	2	67	2	5	5	2	4	1	1	4	1	4	1
	3	2	3	3	3	3	3	3	0	1	1	3	1	3	3	2	3	3	3	3	1	3	2	2	3	0	3	0	2	2	57	2	4	5	1	4	1	2	5	2	23	0
	3	3	3	3	3	3	3	3	3	0	0	3	0	3	3	0	3	3	3	3	0	3	0	3	3	3	3	3	3	2	57	2	3	5	2	3	2	2	3	1	30	0
	0	0	0	0	0	0	0	0	0	1	1	1	1	2	2	2	0	0	2	1	1	1	2	0	1	3	0	3	0	2	63	2	5	4	1	6	2	1	4	2	2	1
	0	0	0	0	0	0	0	3	0	0	3	0	0	0	0	0	0	0	0	2	0	3	0	0	0	0	3	0	0	2	59	2	5	5	1	4	1	1	5	2	2	1
	0	0	1	0	0	0	0	0	3	3	3	0	3	0	0	3	1	0	1	3	3	0	3	0	0	2	0	3	0	2	60	2	5	5	2	3	2	2	4	1	3	1
	0	0	0	0	0	0	0	0	0	2	2	1	2	1	1	3	0	2	1	1	2	1	3	0	0	3	2	3	0	2	59	2	5	5	3	3	1	2	4	2	12	1
	0	0	0	0	0	0	0	0	0	1	1	3	1	3	3	2	0	0	3	1	1	3	2	0	3	2	0	2	0	2	42	2	4	5	5	4	1	1	4	2	8	1
	3	2	0	3	3	0	0	2	3	0	0	1	0	3	0	3	2	0	0	1	0	0	1	0	1	0	1	0	0	2	33	2	5	5	1	4	1	2	5	2	2	1
	3	3	3	2	3	1	2	0	3	2	0	0	0	3	1	3	3	3	0	3	1	3	3	2	0	0	3	0	3	2	59	2	3	5	1	3	3	1	5	1	10	0
	3	3	3	0	3	0	0	3	0	0	0	0	0	3	0	0	3	0	0	0	0	0	3	2	0	1	1	1	1	2	67	2	3	5	2	4	3	2	5	1	2	1
	3	3	3	3	3	2	3	3	2	3	0	0	2	3	0	3	3	3	0	3	3	0	3	2	0	0	3	0	2	2	57	2	2	5	4	3	1	2	3	1	5	0
	3	3	3	3	3	2	0	3	3	3	0	3	2	3	3	3	3	3	3	3	3	2	3	2	3	3	2	3	3	2	59	1	2	5	4	3	2	2	6	2	8	1
	3	2	2	3	3	2	3	3	0	0	1	0	0	3	0	3	3	3	3	3	0	3	3	2	0	0	3	3	3	2	67	2	5	5	4	3	2	2	5	1	5	0
	3	0	0	3	3	3	0	2	3	3	0	0	0	3	3	3	0	0	3	3	3	0	3	0	2	2	2	2	3	2	57	2	5	5	1	3	3	2	4	1	2	1
	3	2	3	3	3	3	3	2	3	3	3	3	2	3	3	3	0	3	3	3	3	3	3	3	3	3	2	3	3	2	57	2	5	5	1	4	1	1	4	1	1	0
	3	2	3	3	3	3	3	2	3	3	0	3	3	3	3	3	2	3	3	3	3	3	2	3	3	3	2	3	3	1	63	2	5	5	2	4	1	1	3	1	16	1
	3	0	3	0	3	0	3	1	0	3	0	0	0	3	1	3	0	2	0	0	0	0	3	0	0	0	3	0	3	2	59	2	5	5	2	4	1	1	4	1	4	1
	0	3	0	2	3	3	2	0	3	3	2	3	3	3	3	3	2	2	3	3	3	2	3	3	3	3	3	3	3	2	60	2	4	5	1	4	1	2	5	2	23	0
	3	3	0	0	0	0	0	0	1	0	0	0	1	3	0	0	3	0	1	0	1	0	0	0	1	0	0	1	0	2	59	2	3	5	2	3	2	2	3	1	30	0
	3	3	2	3	3	3	0	3	3	3	0	3	0	3	3	2	3	2	3	2	3	3	2	2	0	3	3	0	3	2	42	2	5	4	1	6	2	1	4	2	2	1
	3	0	1	0	3	0	0	3	0	0	1	0	0	3	0	0	3	0	0	0	0	0	0	3	0	0	0	0	0	2	33	2	5	5	1	4	1	1	5	2	2	1
	0	3	0	0	3	0	2	3	3	3	0	3	3	3	2	3	0	2	0	1	0	3	2	1	0	3	0	3	3	2	59	2	5	5	2	3	2	2	4	1	3	1
	0	3	2	0	2	3	2	3	0	3	0	3	0	3	0	2	0	0	0	1	0	3	3	0	0	1	0	0	0	2	67	2	5	5	3	3	1	2	4	2	20	1
	3	3	2	2	3	0	0	0	0	1	0	0	1	3	0	3	2	2	0	0	0	0	3	0	0	0	1	0	0	2	57	2	4	5	5	4	1	1	4	2	8	1
	3	0	1	0	1	0	0	1	0	0	1	3	0	3	1	1	2	0	0	3	0	0	0	0	1	0	0	1	1	2	59	2	5	5	1	4	1	2	5	2	2	1
	3	1	0	0	0	1	0	0	3	1	0	3	0	2	0	0	0	3	1	0	1	3	0	0	0	1	0	0	0	2	42	2	3	5	1	3	3	1	5	1	10	0
	0	3	0	0	3	0	0	0	0	0	1	0	3	2	1	3	3	3	0	0	0	0	3	0	0	0	0	0	0	2	33	2	3	5	2	4	3	2	5	1	2	1
	3	3	1	0	3	3	0	3	2	0	0	3	0	3	0	3	0	3	3	2	0	3	3	0	0	2	0	3	3	2	44	2	2	5	4	3	1	2	3	1	15	0
	3	3	0	2	3	3	2	3	3	3	3	3	3	3	3	2	2	3	3	2	3	3	3	3	3	2	2	3	3	2	50	1	2	5	4	3	2	2	6	2	8	1
	3	2	0	0	0	1	0	0	0	1	0	1	0	0	1	0	0	1	0	1	0	1	0	0	1	1	0	0	1	2	39	2	3	5	1	3	2	2	4	1	2	1
	0	1	1	0	3	0	0	3	0	3	0	0	0	1	0	3	3	3	0	0	1	0	3	0	0	0	0	0	3	2	58	2	5	5	5	3	2	1	4	1	2	1
	0	0	0	3	3	0	0	0	0	3	0	0	2	0	0	3	2	3	0	0	0	0	3	0	0	0	1	0	0	1	65	2	3	5	4	3	2	2	4	1	3	0
	3	2	3	2	3	2	3	2	3	3	3	3	3	3	2	2	3	3	3	3	2	2	2	3	3	3	3	2	3	2	56	2	5	5	2	2	2	2	4	1	13	1
	3	1	0	0	0	0	1	0	1	0	0	0	0	3	0	0	1	0	1	0	1	1	0	0	0	0	1	0	0	1	27	2	3	5	1	3	2	2	4	1	2	0
	1	2	0	0	3	0	0	0	0	1	0	0	1	1	3	0	1	0	1	0	0	1	0	0	1	3	0	3	1	2	59	2	3	5	1	3	2	2	4	1	3	1
	0	0	3	1	0	1	3	0	0	0	1	0	0	0	3	1	0	0	0	1	0	0	3	1	0	3	0	2	0	1	42	1	2	5	4	3	2	2	2	2	7	1
	3	3	3	0	0	0	0	3	0	0	0	0	0	0	0	3	0	0	3	0	0	0	0	0	1	0	3	2	1	2	33	2	3	5	4	3	3	2	5	2	5	1
	3	0	3	3	2	0	3	3	0	0	2	0	3	3	3	3	1	0	3	3	0	3	2	0	0	3	0	3	0	1	59	2	5	5	1	3	3	2	4	1	2	0
	2	2	3	3	2	3	3	3	3	3	2	2	3	3	3	3	0	2	3	3	2	3	3	3	3	3	3	3	3	1	67	1	2	5	4	3	2	2	2	2	8	1
	0	0	1	0	1	0	1	0	0	1	1	0	0	1	3	2	0	0	0	1	0	0	0	1	0	1	0	0	1	2	57	2	5	5	1	4	2	1	4	2	7	1
	3	3	3	0	0	1	0	3	0	0	0	0	0	3	0	1	1	0	3	0	0	3	0	3	0	0	0	1	0	1	57	2	3	5	1	3	2	2	3	1	4	1
	3	2	3	0	0	0	0	3	0	0	0	1	0	0	0	0	0	3	3	0	0	0	0	3	0	0	2	0	0	2	63	2	5	5	1	3	3	2	4	1	2	0
	2	3	3	3	3	2	2	2	3	3	3	3	2	3	3	2	3	2	3	2	3	2	3	3	3	3	3	3	2	2	59	1	2	5	4	3	2	2	2	2	8	1
	0	1	0	1	0	1	1	0	0	0	0	1	0	0	3	1	0	0	0	0	1	0	1	0	0	0	0	3	0	2	60	1	2	5	4	3	2	2	2	2	8	1
	1	0	3	0	3	2	0	0	1	0	0	1	0	1	0	1	0	0	3	3	2	2	3	0	0	0	0	1	0	1	59	2	5	5	4	3	2	2	5	1	5	0
	0	0	3	1	3	3	3	0	3	1	3	3	2	0	0	3	0	3	3	0	1	0	1	0	0	1	0	0	1	2	42	2	5	5	1	3	3	2	4	1	2	1
	0	0	3	0	0	3	0	0	0	0	0	3	2	0	1	1	1	1	3	1	0	0	0	1	0	0	3	1	0	2	33	2	5	5	1	4	1	1	4	1	1	0
	0	2	3	0	3	3	3	0	3	3	0	3	2	0	0	3	0	2	0	3	0	0	3	0	0	0	0	0	1	2	59	2	5	5	2	4	1	1	3	1	20	1
	3	2	3	3	3	3	3	3	3	3	2	3	2	3	3	2	3	3	3	3	1	0	3	3	0	3	2	0	0	1	67	2	5	5	2	4	1	1	4	1	4	1
	0	0	3	0	3	3	3	3	3	0	3	3	2	0	0	3	3	3	3	3	0	2	3	3	2	3	3	3	3	2	57	2	4	5	1	4	1	2	5	2	23	0
	0	0	3	3	3	0	0	3	3	3	0	3	0	2	2	2	2	3	3	2	0	0	0	1	0	0	0	1	0	2	59	2	3	5	2	3	2	2	3	1	30	0
	3	2	3	3	3	0	3	3	3	3	3	3	3	3	3	2	3	3	0	1	1	0	3	0	0	3	0	3	0	2	42	2	5	4	1	6	2	1	4	2	2	1
	3	3	3	3	3	2	3	3	3	3	3	2	3	3	3	2	3	3	0	0	0	3	3	0	0	0	0	3	0	2	33	2	5	5	1	4	1	1	5	2	2	1
	0	0	3	1	3	0	2	0	0	0	0	3	0	0	0	3	0	3	3	2	3	2	3	2	3	2	3	3	3	2	59	2	5	5	2	3	2	2	4	1	3	1
	3	3	3	3	3	2	2	3	3	3	2	3	3	3	3	3	3	3	3	1	0	0	0	0	1	0	1	0	0	2	44	2	5	5	3	3	1	2	4	2	20	1
	0	1	3	0	0	3	0	1	0	1	0	0	0	1	0	0	1	0	1	2	0	0	3	0	0	0	0	1	0	2	50	2	4	5	5	4	1	1	4	2	8	1
	3	0	3	3	2	3	2	3	2	3	3	2	2	0	3	3	0	3	0	0	3	1	0	1	3	0	0	0	1	2	39	2	5	5	1	4	1	2	5	2	2	1
	0	0	3	0	0	3	0	0	0	0	0	0	3	0	0	0	0	0	3	3	3	0	0	0	0	3	0	0	0	2	58	2	3	5	1	3	3	1	5	1	10	0
	3	3	3	2	3	0	2	0	1	0	3	2	1	0	3	0	3	3	3	0	3	3	2	0	3	3	0	0	2	2	65	2	3	5	2	4	3	2	5	1	3	1
	3	0	3	0	2	0	0	0	1	0	3	3	0	0	1	0	0	0	2	2	3	3	2	3	3	3	3	3	2	2	56	2	2	5	4	3	1	2	3	1	4	0
	0	3	0	2	0	0	0	3	1	0	1	3	0	0	0	1	0	0	0	1	0	0	0	1	0	0	3	1	0	2	27	1	2	5	4	3	2	2	6	2	8	1
	1	0	3	2	1	3	3	3	0	0	0	0	3	0	0	0	0	0	0	3	0	0	3	0	0	0	0	0	1	2	59	2	3	5	1	3	2	2	4	1	2	1
	0	3	0	3	0	3	0	3	3	2	0	3	3	0	0	2	0	3	3	3	1	0	3	3	0	3	2	0	0	2	42	2	5	5	5	3	2	1	4	1	2	1
	3	3	3	3	3	2	2	3	3	2	3	3	3	3	3	2	2	3	3	3	0	2	3	3	2	3	3	3	3	2	33	2	3	5	4	3	2	2	4	1	3	0
	0	1	0	0	1	0	0	1	0	1	0	1	0	0	1	1	0	0	1	2	0	0	0	1	0	0	0	1	0	1	59	2	5	5	2	2	2	2	4	1	2	1
	0	0	0	1	0	3	3	3	0	0	1	0	3	0	0	0	0	0	3	1	1	0	3	0	0	3	0	3	0	2	67	2	3	5	1	3	2	2	4	1	2	0
	0	0	2	0	0	3	2	3	0	0	0	0	3	0	0	0	1	0	0	0	0	3	3	0	0	0	0	3	0	1	57	2	3	5	1	3	2	2	4	1	3	1
	3	3	3	3	2	2	3	3	3	3	2	2	2	3	3	3	3	2	3	2	3	2	3	2	3	2	3	3	3	2	57	1	2	5	4	3	2	2	2	2	7	1
	0	0	0	3	0	0	1	0	1	0	1	1	0	0	0	0	1	0	0	1	0	0	0	0	1	0	1	0	0	1	63	2	3	5	4	3	3	2	5	2	5	1
	0	0	1	1	3	0	1	0	1	0	0	1	0	0	1	3	0	3	1	2	0	0	3	0	0	0	0	1	0	2	59	2	5	5	1	3	3	2	4	1	2	0
	1	0	0	0	3	1	0	0	0	1	0	0	3	1	0	3	0	2	0	0	3	1	0	1	3	0	0	0	1	1	60	1	2	5	4	3	2	2	2	2	8	1
	0	0	0	0	0	3	0	0	3	0	0	0	0	0	1	0	3	2	1	3	3	0	0	0	0	3	0	0	0	1	59	2	5	5	1	4	2	1	4	2	7	1
	2	0	3	3	3	3	1	0	3	3	0	3	2	0	0	3	0	3	0	0	3	3	2	0	3	3	0	0	2	2	42	2	3	5	1	3	2	2	3	1	4	1
	2	2	3	3	3	3	0	2	3	3	2	3	3	3	3	3	3	3	3	2	3	3	2	3	3	3	3	3	2	1	33	2	5	5	1	3	3	2	4	1	2	0
	1	0	0	1	3	2	0	0	0	1	0	0	0	1	0	1	0	0	1	2	3	3	2	3	3	3	3	3	2	2	59	1	2	5	4	3	2	2	2	2	8	1
	0	0	0	3	0	1	1	0	3	0	0	3	0	3	0	0	0	1	0	1	0	0	0	1	0	0	3	1	0	2	67	1	2	5	4	3	2	2	2	2	8	1
	0	1	0	0	0	0	0	3	3	0	0	0	0	3	0	0	2	0	0	3	0	0	3	0	0	0	0	0	1	2	57	2	5	5	4	3	2	2	5	1	5	0
	3	3	2	3	3	2	3	2	3	2	3	2	3	3	3	3	3	3	2	3	1	0	3	3	0	3	2	0	0	1	59	2	5	5	1	3	3	2	4	1	2	1
	0	1	0	0	3	1	0	0	0	0	1	0	1	0	0	0	0	3	0	3	0	2	3	3	2	3	3	3	3	2	42	2	5	5	1	4	1	1	4	1	1	0
	0	0	0	0	0	0	1	0	3	1	0	0	0	0	0	0	0	0	0	3	0	0	0	0	0	3	0	3	0	2	33	2	5	5	2	4	1	1	3	1	25	1
	0	0	0	0	0	0	0	0	0	3	0	0	0	0	0	0	0	0	0	0	2	0	0	0	0	0	0	0	0	2	59	2	5	5	2	4	1	1	4	1	4	1
	0	0	0	0	0	1	0	0	3	0	0	0	0	0	0	2	0	0	0	2	0	3	1	0	0	3	0	3	0	1	67	2	4	5	1	4	1	2	5	2	23	0
	0	0	0	0	0	3	3	2	3	3	0	0	3	0	0	3	0	0	0	2	0	0	3	0	0	3	0	3	0	2	57	2	3	5	2	3	2	2	3	1	30	0
	0	0	1	1	1	1	1	1	3	3	3	3	3	3	2	3	1	1	3	3	3	0	3	0	3	0	1	0	0	2	59	2	5	4	1	6	2	1	4	2	2	1
	2	2	3	2	3	2	2	2	3	3	3	3	3	3	3	3	3	3	3	3	3	3	3	2	3	0	2	0	1	2	42	2	5	5	1	4	1	1	5	2	2	1
	1	1	2	1	2	1	1	1	3	1	1	3	1	3	3	2	2	3	3	3	1	3	1	1	2	0	1	1	1	2	33	2	5	5	2	3	2	2	4	1	3	1
	0	0	0	0	0	3	3	2	1	0	0	0	0	0	0	1	0	0	0	0	0	0	0	0	0	2	0	1	0	1	56	1	2	4	1	3	2	2	2	1	2	1
	3	3	3	3	3	3	3	3	3	3	3	0	3	0	0	3	3	0	0	2	3	0	3	3	0	0	0	0	3	1	55	1	2	3	1	2	2	2	2	1	3	1
